# Supplementary material for: A simpler and highly efficient protocol for the preparation of biodiesel from soap stock oil using a BBSA catalyst
Source: Royal Society of Chemistry journal article supplement (doi:10.1039/c5ra13422f), 2015-01-01
Supplement: c5ra13422f1.pdf [file c5ra13422f1.pdf]

## A simpler and highly efficient protocol for the preparation of biodiesel from soap stock oil using BBSA catalyst

Mehulkumar L. Savaliya, Bharatkumar Z. Dholakiya\*

*Department of Applied Chemistry, S.V. National Institute of Technology (SVNIT), Ichchhanath, Surat-395007, Gujarat, India.*

\*Corresponding Author. Tel +91-9428949595, E-mail address: bharat281173@gmail.com, msmeahulsavaliya@gmail.com

-: Supporting information:-

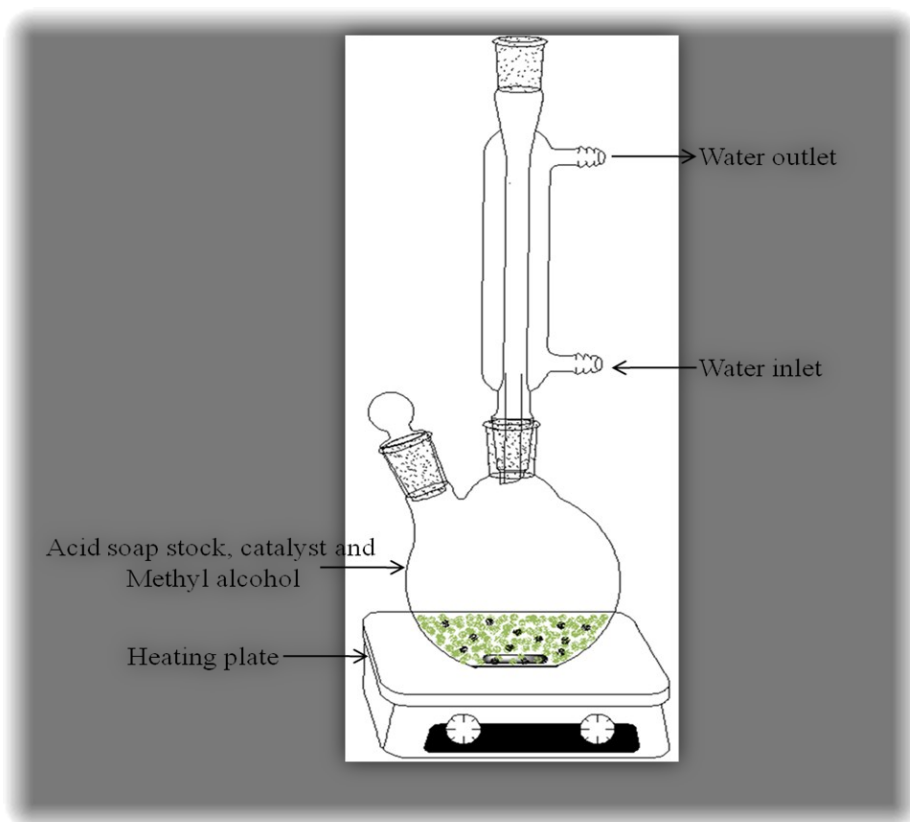

Figure S1. Reaction assembly for production of biodiesel from soap stock oil

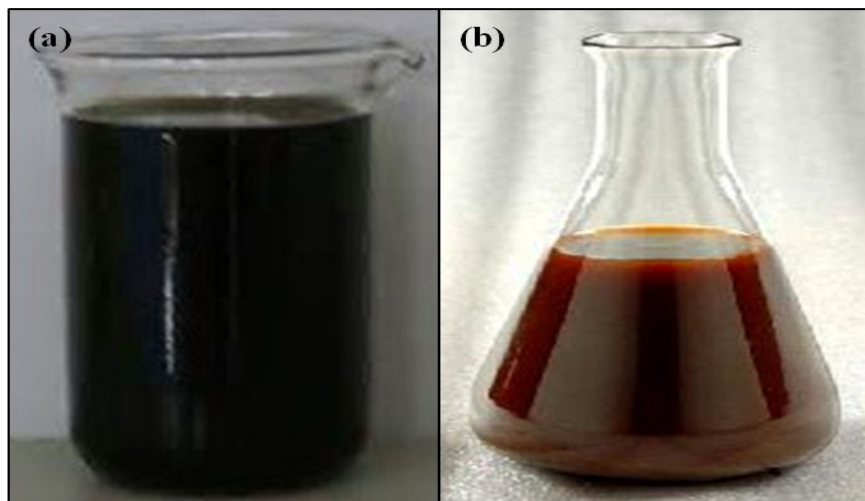

**Figure S2. (a) Stock oil and (b) Soap stock biodiesel**

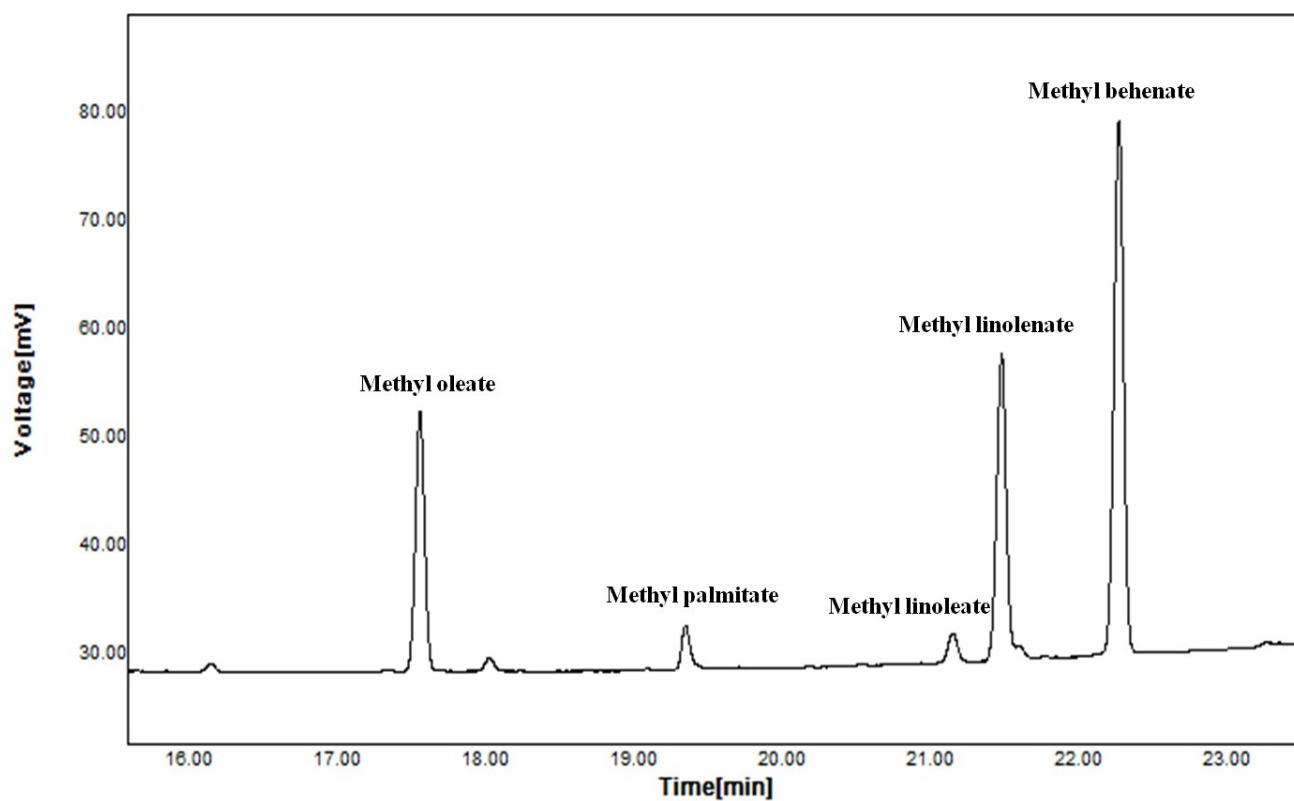

**Figure S3. GC-FID chromatogram of soap stock biodiesel**

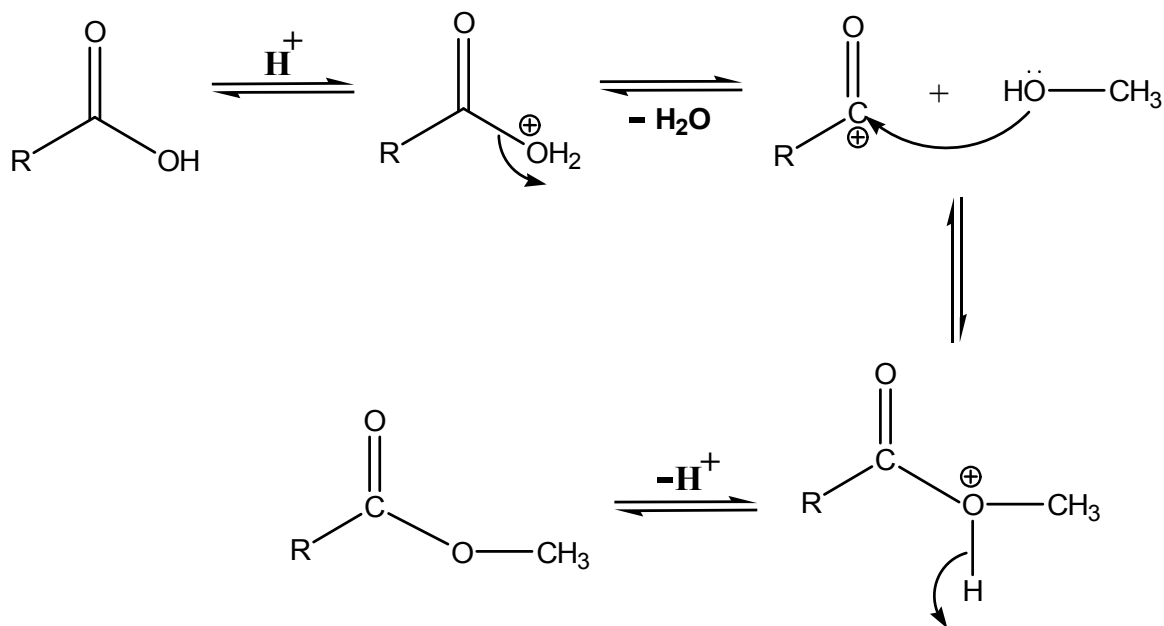

Figure S4. Proposed mechanism for esterification of free fatty acid to biodiesel

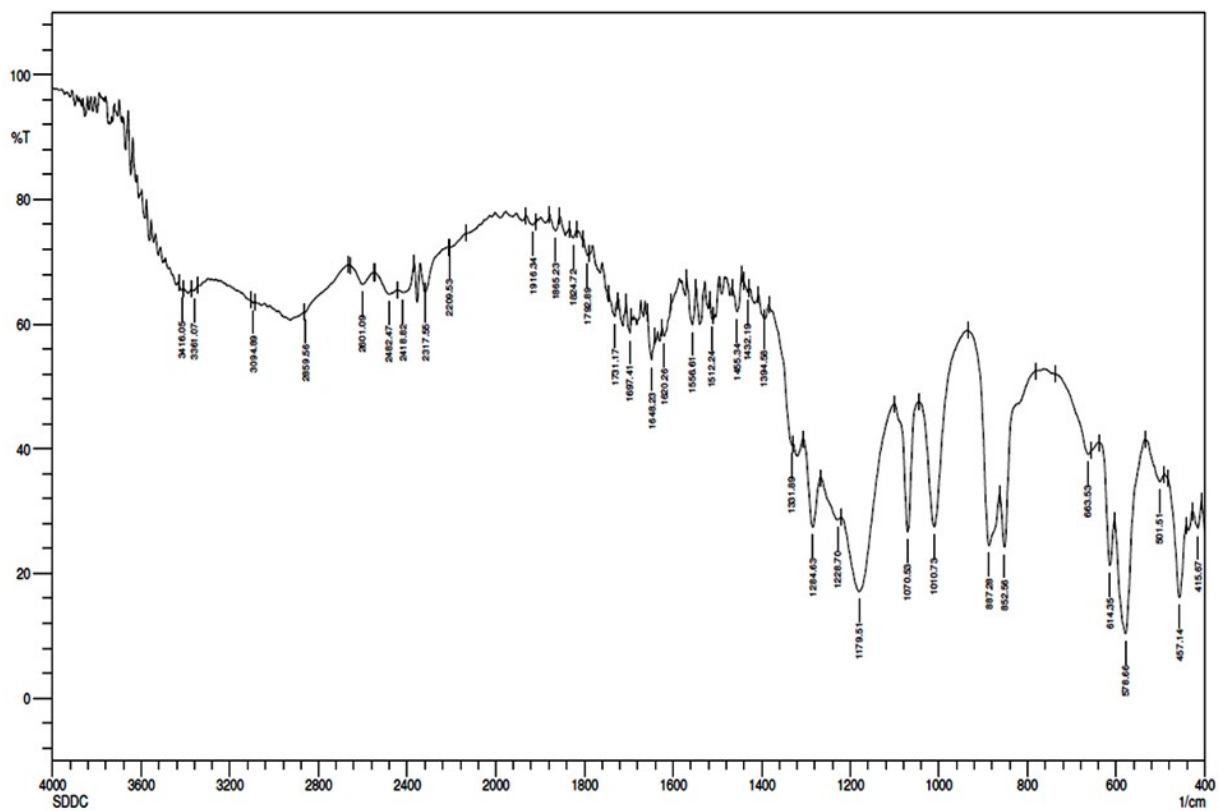

Figure S5. FT-IR spectrum of BBSA catalyst

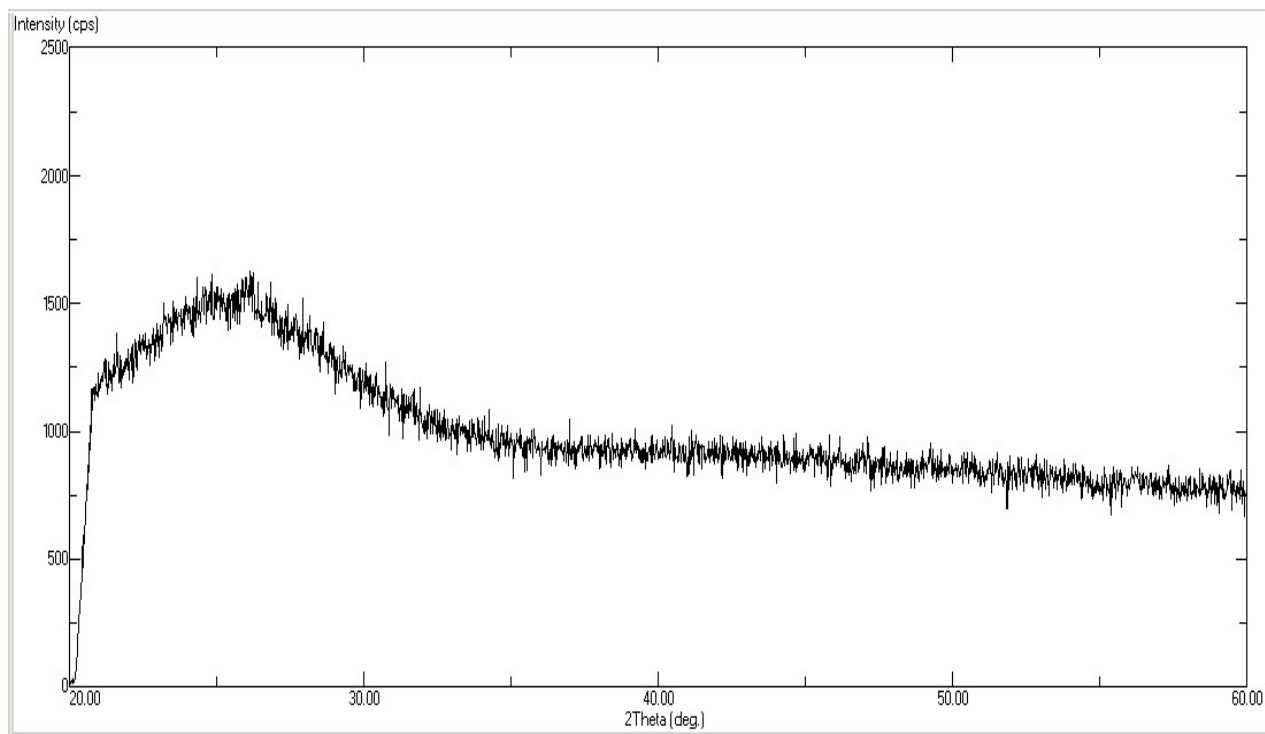

**Figure S6. X-ray diffractogram of BBSA**

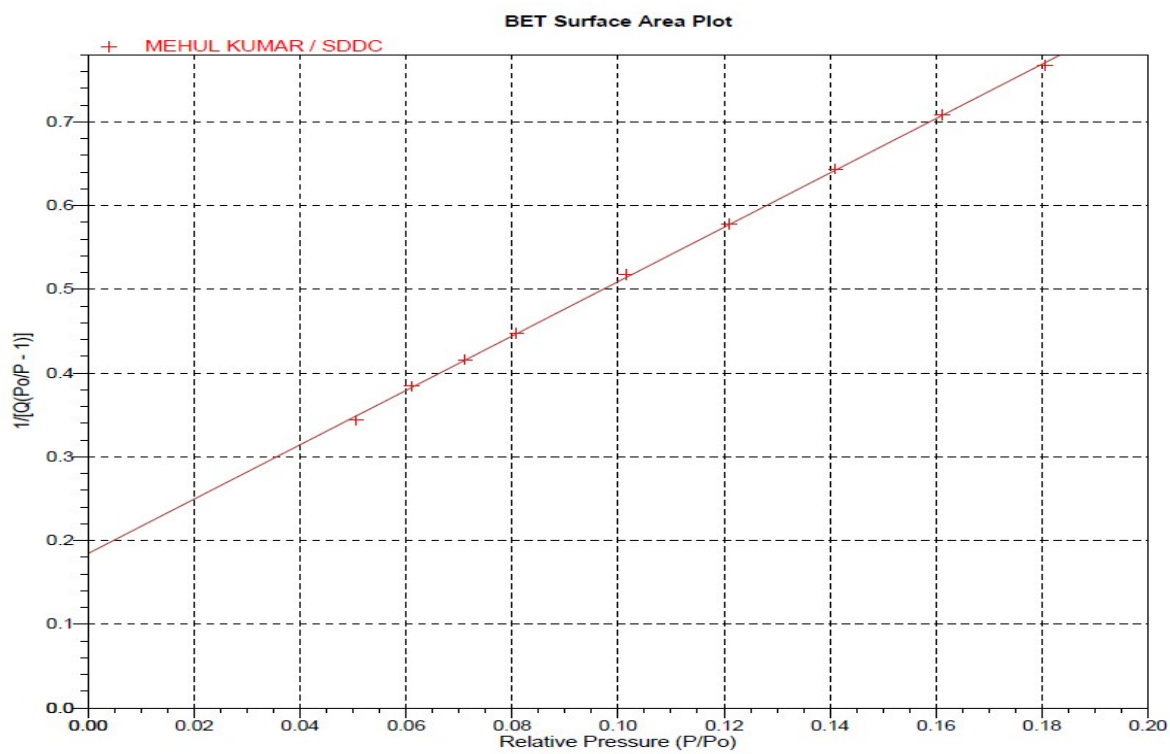

**Figure S7. BET isotherm of BBSA catalyst**

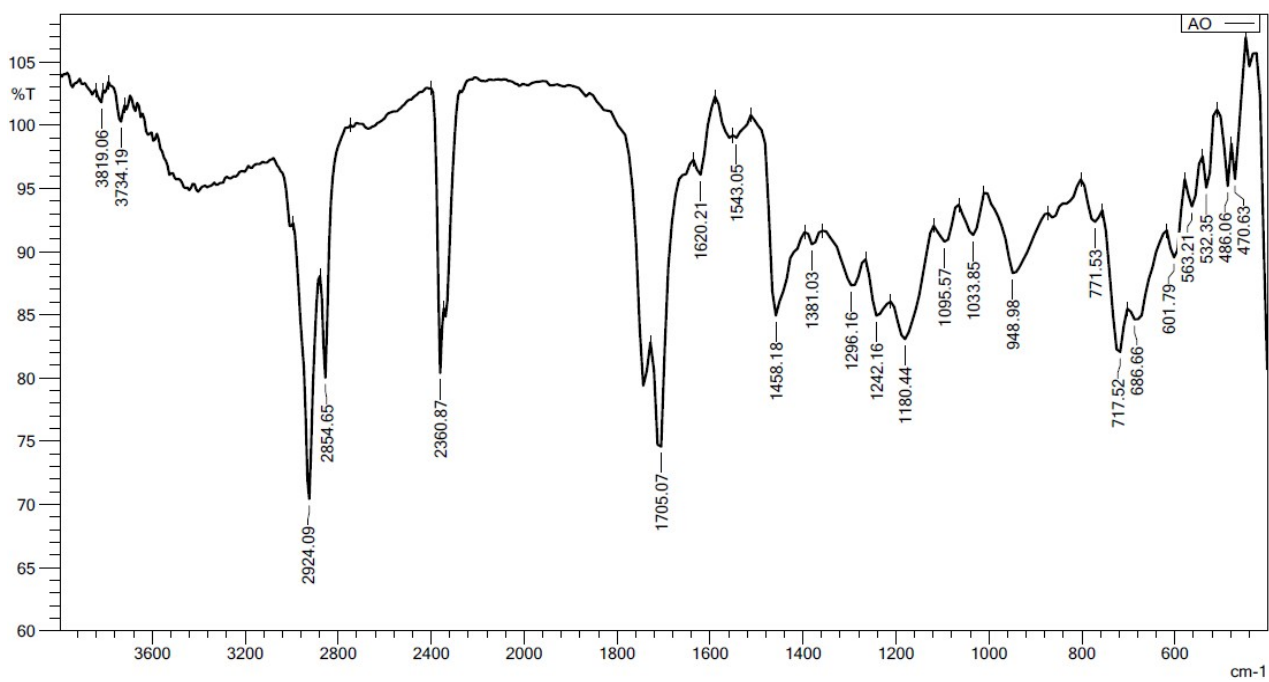

**Figure S8. FT-IR spectrum of soap stock oil**

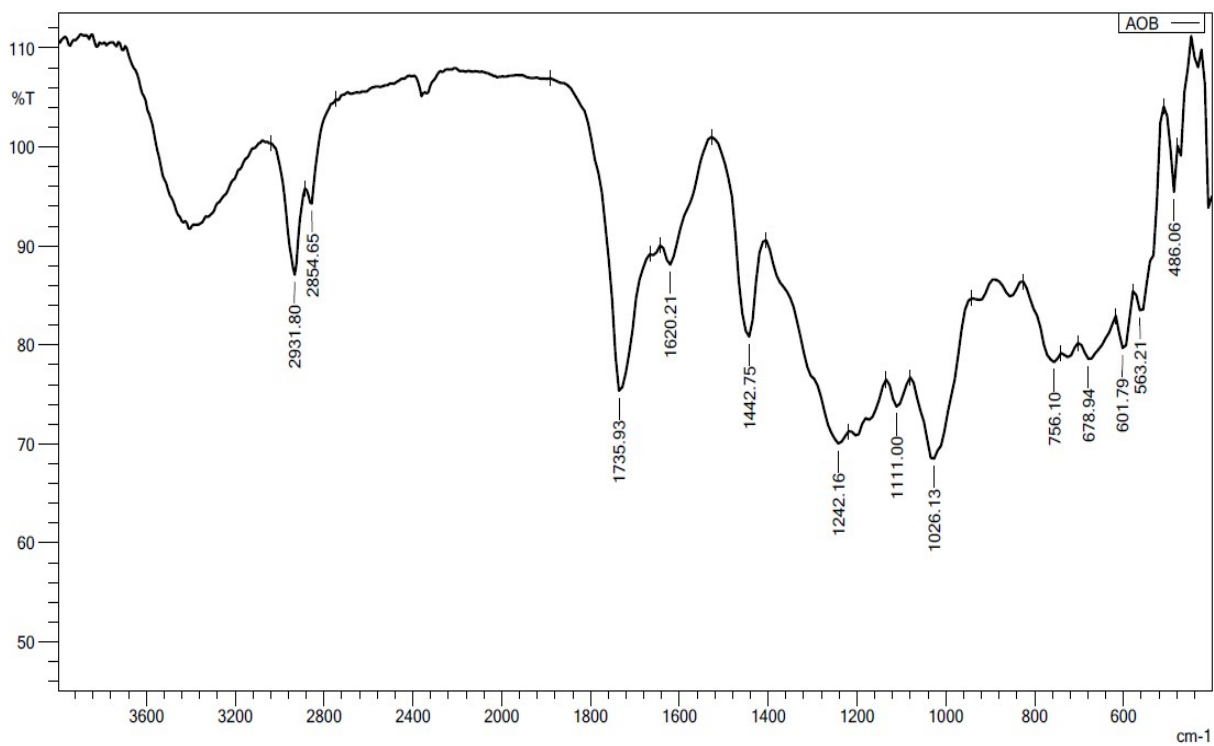

**Figure S9. FT-IR spectrum of soap stock biodiesel**

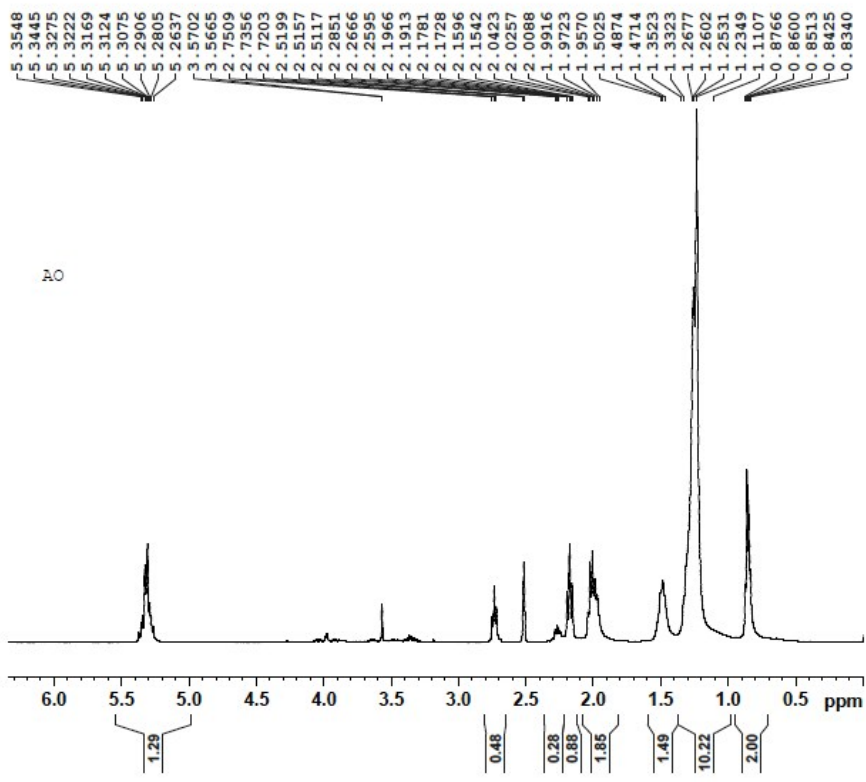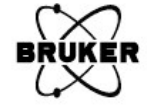

```

NAME          MK-AO
EXPNO         1
PROCNO        1
Date_         20150411
Time          16.59
INSTRUM       spect
PROBHD        5 mm BBO BB-1H
FULPROG       zg30
TD            65536
SOLVENT       DMSO
NS            16
DS            2
SWH           8223.695 Hz
FIDRES        0.125483 Hz
AQ            3.9846397 sec
RG            32
DW            60.800 usec
DE            6.50 usec
TE            300.0 K
D1            1.00000000 sec
TDO           1

===== CHANNEL f1 =====
NUC1          1H
P1            14.10 usec
PL1           0.00 dB
PL1W          8.31494441 W
SFOL          400.1324710 MHz
SI            32768
SF            400.1299978 MHz
WDW           EM
SSB           0
LB            0.30 Hz
GB            0
PC            1.00
  
```

Figure S10. <sup>1</sup>H NMR spectrum of soap stock oil

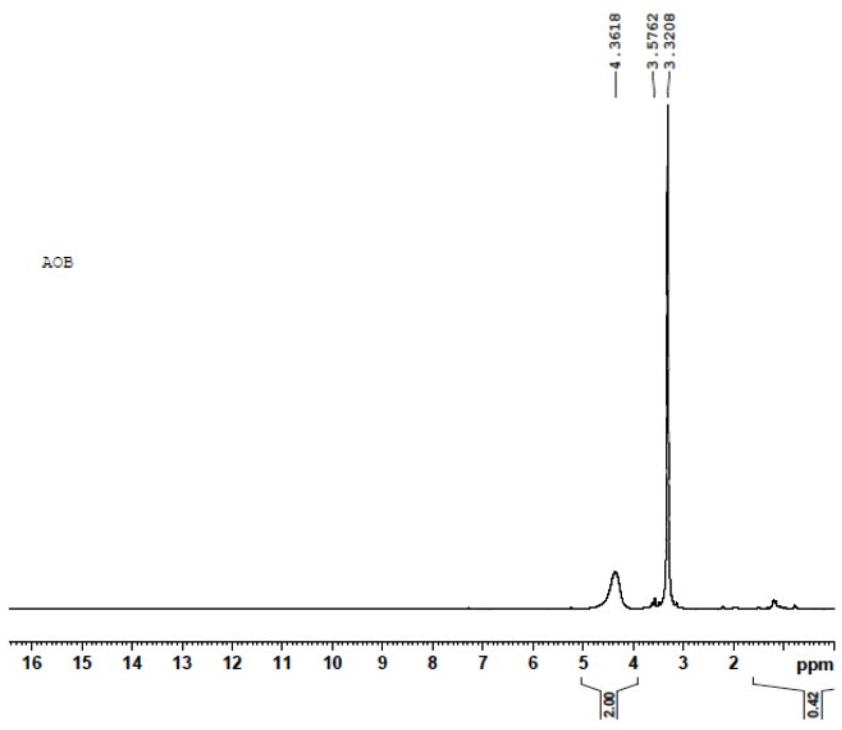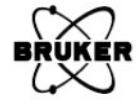

```

NAME          MK-AOB
EXPNO         1
PROCNO        1
Date_         20150411
Time          16.59
INSTRUM       spect
PROBHD        5 mm BBO BB-1H
FULPROG       zg30
TD            65536
SOLVENT       CDCl3
NS            16
DS            2
SWH           8223.695 Hz
FIDRES        0.125483 Hz
AQ            3.9846397 sec
RG            16
DW            60.800 usec
DE            6.50 usec
TE            300.0 K
D1            1.00000000 sec
TDO           1

===== CHANNEL f1 =====
NUC1          1H
P1            14.10 usec
PL1           0.00 dB
PL1W          8.31494441 W
SFOL          400.1324710 MHz
SI            32768
SF            400.1300000 MHz
WDW           EM
SSB           0
LB            0.30 Hz
GB            0
PC            1.00
  
```

Figure S11. <sup>1</sup>H NMR spectrum of synthesized soap stock biodiesel

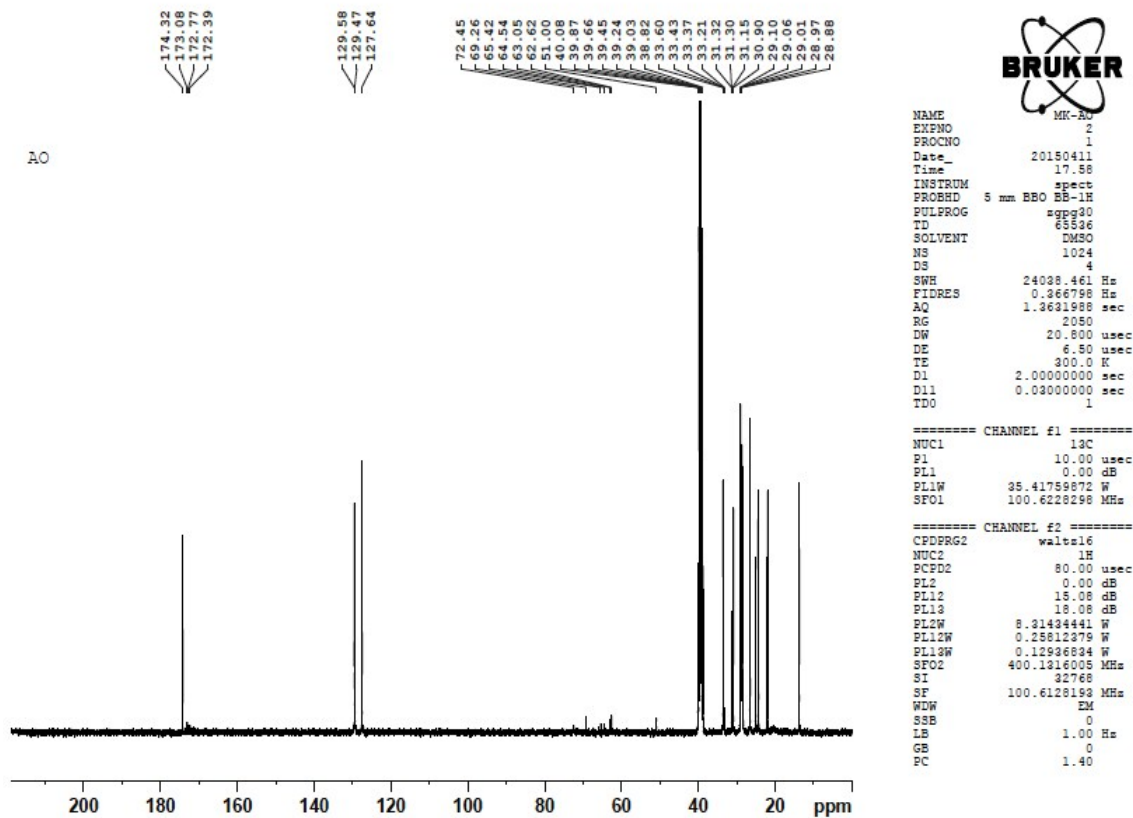

Figure S12. <sup>13</sup>C NMR spectrum of soap stock oil

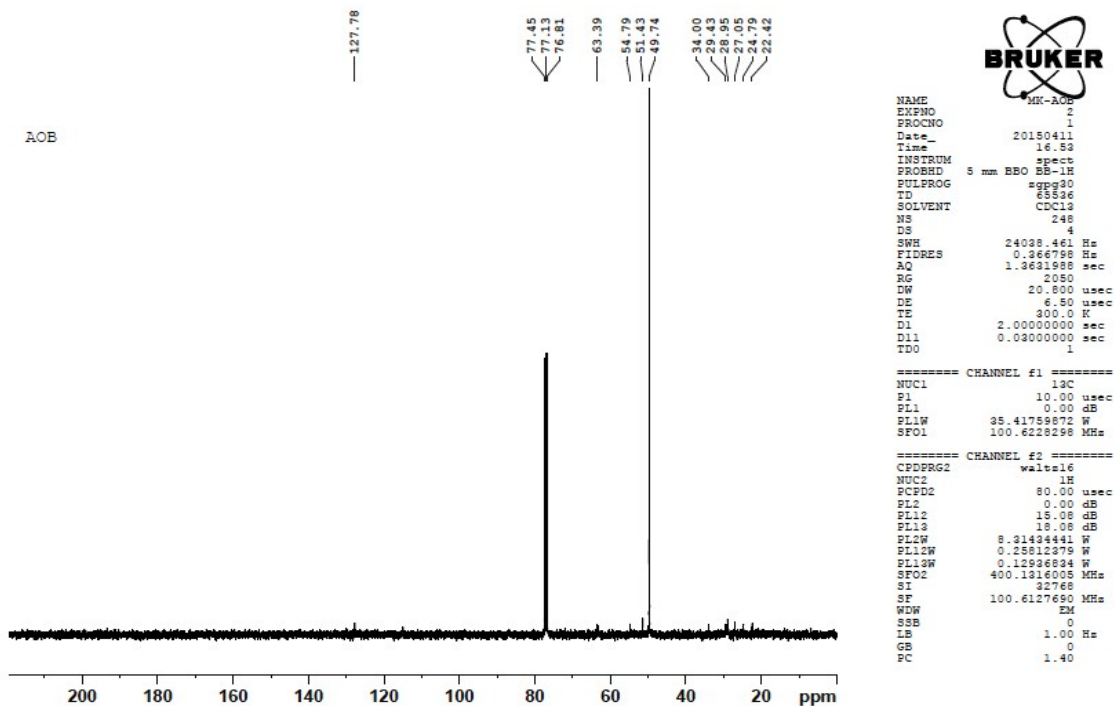

Figure S13. <sup>13</sup>C NMR spectrum of synthesized soap stock biodiesel
